# Supplementary material for: Roll-to-roll redox-welding and embedding for silver nanowire network electrodes
Source: Royal Society of Chemistry journal article supplement (doi:10.1039/c8nr01040d), 2018-01-01
Supplement: c8nr01040d1.pdf [file c8nr01040d1.pdf]

Supporting Information for

## Roll-to-Roll Redox-Welding and Embedding for Silver Nanowire Network Electrodes

Yeontae Kim,<sup>1,†</sup> Yeong Eun Sul,<sup>2,†</sup> Hyungseok Kang,<sup>1,†</sup> Yongsuk Choi,<sup>1</sup> Ho Sun Lim<sup>4</sup> Sungjoo Lee,<sup>1</sup> Lyongsun Pu,<sup>3</sup> Gi-Ra Yi,<sup>2</sup> Sung Min Cho,<sup>1,2,\*</sup> Jeong Ho Cho<sup>1,2,\*</sup>

<sup>1</sup>SKKU Advanced Institute of Nanotechnology (SAINT), <sup>2</sup>Department of Nano Engineering, <sup>3</sup>Research & Business Foundation, Sungkyunkwan University Suwon 440-746, Republic of Korea.

<sup>4</sup>Department of Chemical and Biological Engineering, Sookmyung Women's University, Seoul 04310, Republic of Korea.

E-mail: [jhcho94@skku.edu](mailto:jhcho94@skku.edu) and [sungmcho@skku.edu](mailto:sungmcho@skku.edu)

<sup>†</sup>These authors contributed equally this work.

### METHODS

*Roll-to-roll redox-welding of AgNWs:* The AgNW networks (Nanopyxis Co.) were formed by the Meyer rod coating method on plastic substrates (PI and PET) using 0.5 wt% AgNWs dispersed in isopropyl alcohol (PA). The average diameter and length of the AgNWs were 30 nm and 30  $\mu$ m, respectively. The deposition densities for the AgNW network were controlled using different Meyer rods (#5, #7, #10, and #14). The as-coated AgNW films were sequentially immersed in the aqueous solution of HNO<sub>3</sub> (0.05 to 5 M) and NaBH<sub>4</sub> (0.005 to 0.05 M) for various times. The surfaces of the AgNW films were visualized by scanning electron microscopy (SEM, JSM-7600F, Jeol Ltd.). The sheet resistance and optical transmittance were measured by a four-point probe technique (Keithley 2182A and 6221) and a UV-vis spectrophotometer (Agilent 8453), respectively. In order to fabricate the single-wire junction of the AgNWs, the AgNW suspensions were diluted and deposited onto the Si wafer. The contact pads were defined by electron-beam lithography and 100-nm-thick Au electrodes were deposited by thermal evaporation. The *I-V* characteristics of both the wire and junction were measured using a Keithley 4200 probe system.

*Roll-to roll embedding of AgNWs:* A PI film coated with large-area redox-welded AgNWs was placed in a roll-to-roll equipment. A UV-curable prepolymer resin (NOA63, Norland) was then dropped using dispersers onto the AgNWs-PI film moving at a velocity of 1 cm s<sup>-1</sup>. The bare PET film was laminated onto the UV-resin-coated AgNWs/PI film at a pressure of 0.6 MPa. The laminated film was transferred to a UV-exposure chamber (360 nm, 5000 mJ cm<sup>-2</sup>) to cross-link the resin. The embedded AgNWs/PET film was then separated from the PI film.

*Fabrication of OLEDs:* Six organic materials required for the blue-emitting fluorescent OLED was deposited via a vacuum evaporator: 35-nm-thick 1,4,5,8,9,11-hexaazatriphenylene-hexacarbonitrile as the hole injection layer, 80-nm-thick *N,N'*-bis-(1-naphthyl)-*N,N'*-diphenyl-1,1'-biphenyl-4,4'-diamine as the hole transport layer, 20-nm-thick 4,4',4''-Tri(*N*-carbazolyl)triphenylamine as the electron blocking layer, 20-nm-thick 2-methyl-9,10-di(2-naphthyl) anthracene and 5% 1,6-bis(*N*-phenyl-*p*-CN-phenylamino)-pyrenes (Pyrene-CN) as the host and dopant materials, respectively, for blue fluorescent emission, 40-nm-thick LG201 doped with 50% Liq as the electron transporting layer, and 1.5-nm-thick Liq as an electron injection layer. Finally, a 100-nm-thick aluminum layer was deposited thermally to form the cathode electrode. The emission area was  $10 \times 10 \text{ cm}^2$ . The optoelectrical properties were measured by a Keithley 236 source meter and a Minlota CS2000 spectroradiometer.

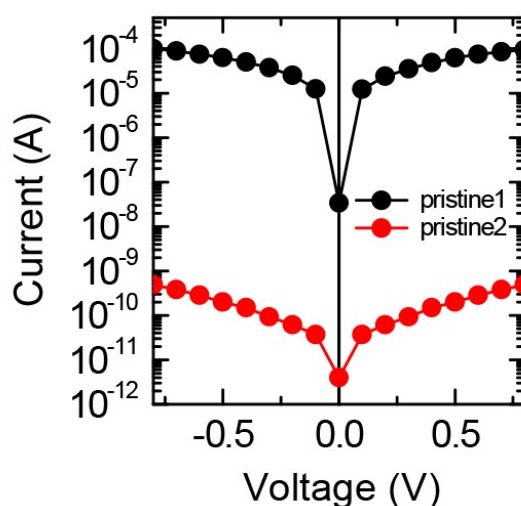

**Figure S1.** Current-voltage curves of the pristine AgNW junctions.

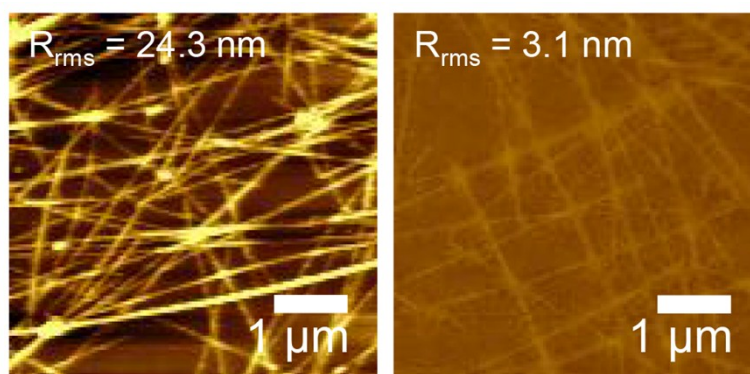

**Figure S2.** AFM images of the AgNWs films before and after embedding process.

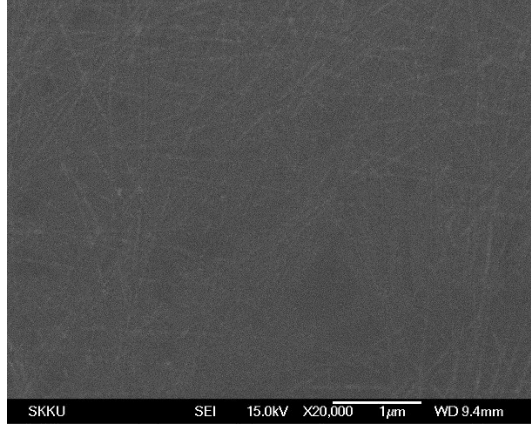

**Figure S3.** SEM image of the AgNWs embedded in UV-resin.

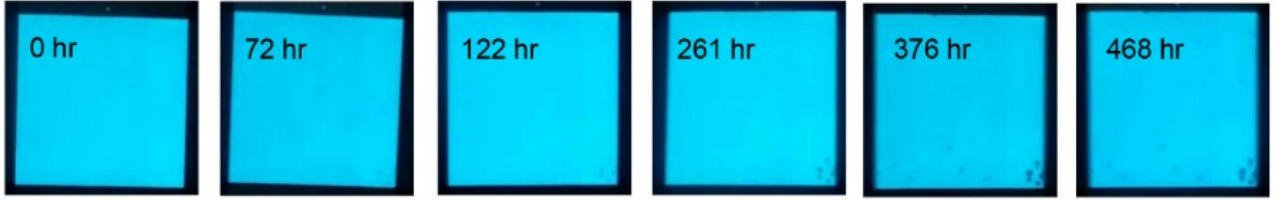

**Figure S4.** Environmental stability of the OLED devices based on the redox-welded AgNWs.

**Table S1.** Surface energies of UV-resin, PET, and PI.

|          | contact angle |               | $\gamma^d$ (mJ/m <sup>2</sup> ) | $\gamma^p$ (mJ/m <sup>2</sup> ) | $\gamma$ (mJ/m <sup>2</sup> ) |
|----------|---------------|---------------|---------------------------------|---------------------------------|-------------------------------|
|          | water         | diiodomethane |                                 |                                 |                               |
| UV-resin | 41.0°         | 48.5°         | 23.2                            | 33.1                            | 56.3                          |
| PET      | 44.0°         | 21.7°         | 35.9                            | 22.9                            | 58.9                          |
| PI       | 49.5°         | 42.0°         | 28.0                            | 24.0                            | 52.0                          |

$$WA_{12} = 4 \left( \frac{\gamma_1^d \gamma_2^d}{\gamma_1^d + \gamma_2^d} + \frac{\gamma_1^p \gamma_2^p}{\gamma_1^p + \gamma_2^p} \right)$$

$$WA_{UV-resin/PET} = 110.5 \text{ mJ/m}^2$$

$$WA_{UV-resin/PI} = 106.4 \text{ mJ/m}^2$$
